# Supplementary material
Source: PubMed Central journal article supplement (PMC3622048)

# Supplementary Figure

A

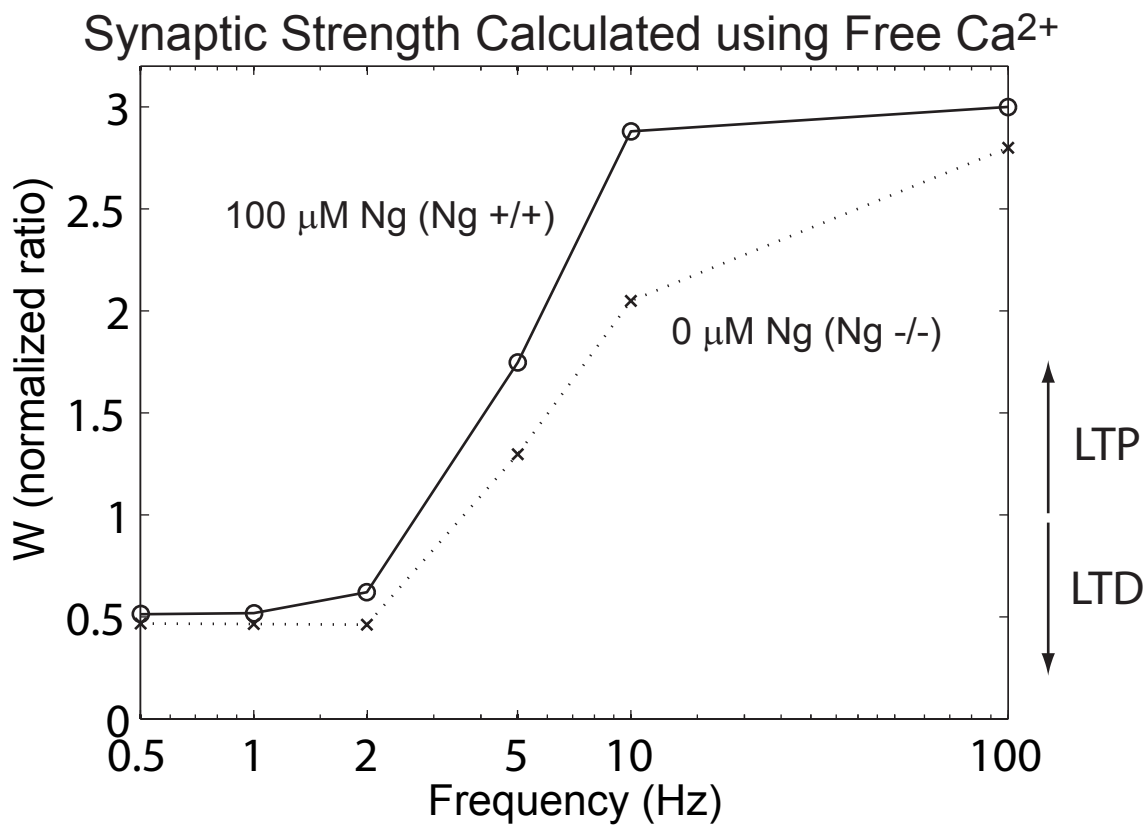

B

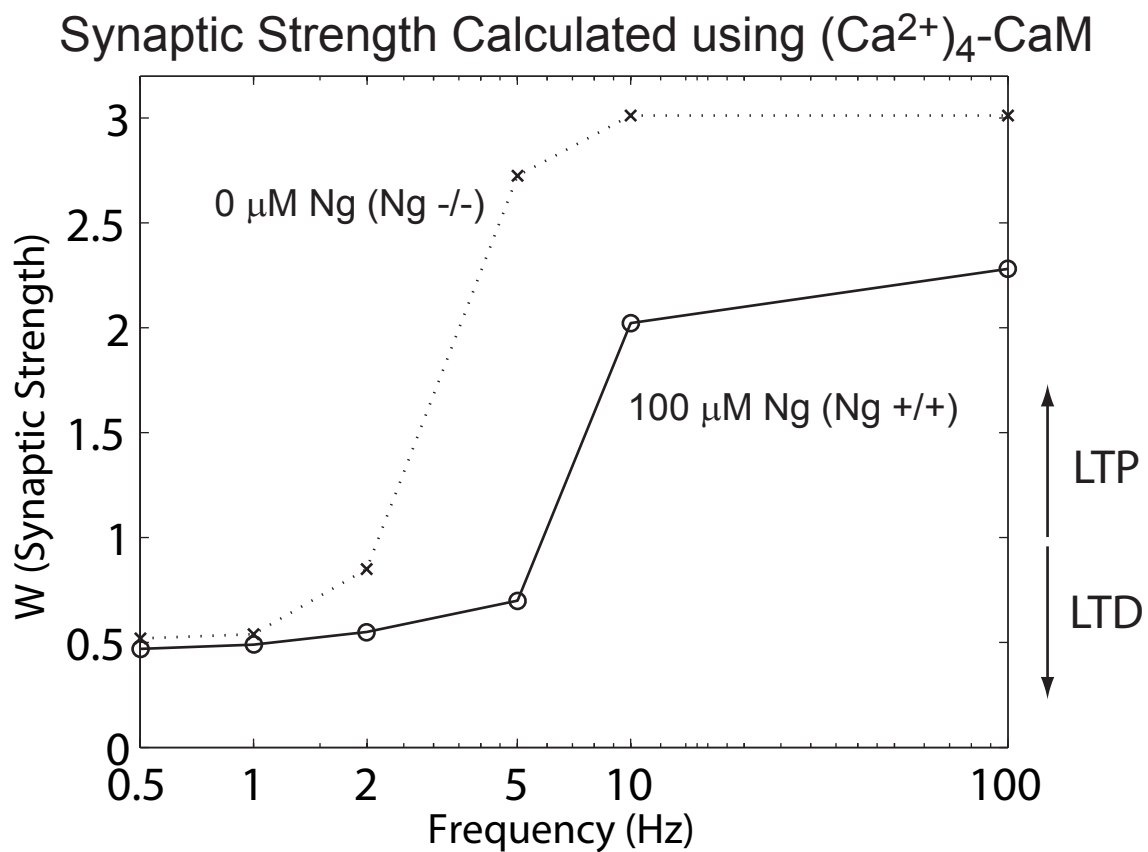

Supplement: NIHMS448928-supplement-supp_data.pdf [file NIHMS448928-supplement-supp_data.pdf]
